# Supplementary material
Source: Springer Nature journal article supplement (https://www.springermedizin.de/resource/supplementary/12997_2009_55_MOESM2_ESM.pdf/9623200)

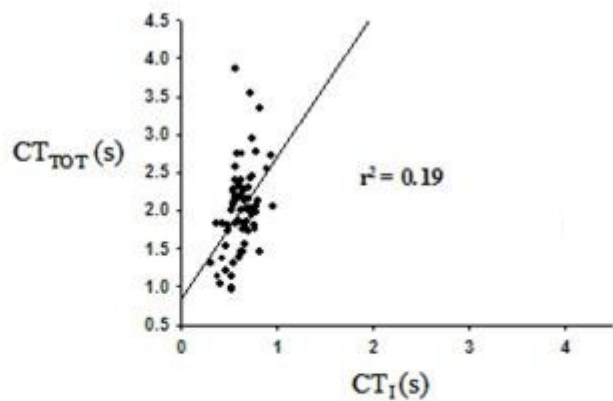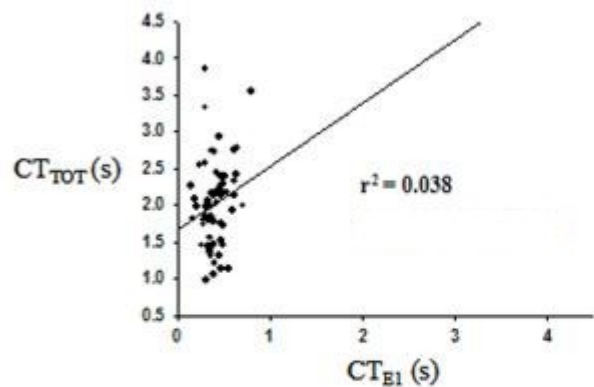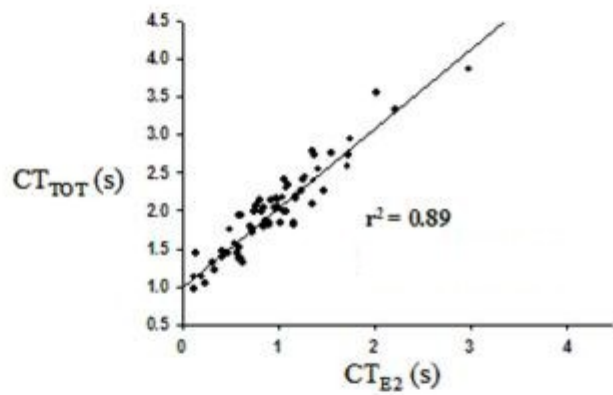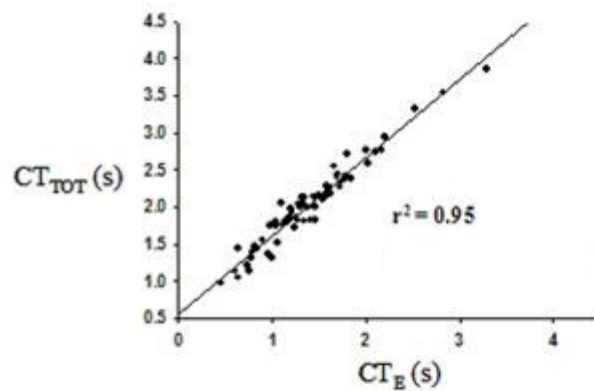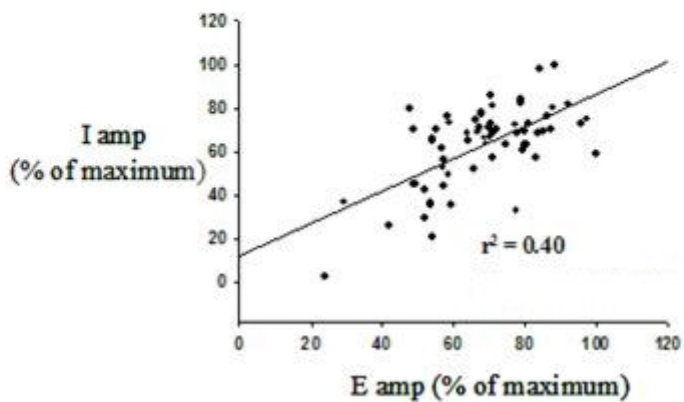

Supplement: MOESM2 [file 9623200]
